# Supplementary material for: Solvent-dependent alignments and halogen-related interactions in inclusion crystals of adamantane-based macrocycle with pyridazine moieties
Source: Royal Society of Chemistry journal article supplement (doi:10.1039/d0ce01576h), 2020-12-08
Supplement: d0ce01576h1.pdf [file d0ce01576h1.pdf]

## Supplementary Information

### Solvent-dependent alignments and halogen-related interactions in inclusion crystals of adamantane-based macrocycle with pyridazine moieties

Masahide Tominaga,\* Tadashi Hyodo, Yuya Hikami and Kentaro Yamaguchi\*

Faculty of Pharmaceutical Sciences at Kagawa Campus, Tokushima Bunri University,  
1314-1 Shido, Sanuki, Kagawa 769-2193, Japan

E-mail: tominagam@kph.bunri-u.ac.jp and kyamaguchi@kph.bunri-u.ac.jp

#### Table of Contents

|                                                                                                                                                                                         |     |
|-----------------------------------------------------------------------------------------------------------------------------------------------------------------------------------------|-----|
| • $^1\text{H}$ and $^{13}\text{C}$ NMR spectra of <b>1</b>                                                                                                                              | S2  |
| • The centroid-centroid distances between each aromatic and aliphatic moieties in crystals <b>1a–f</b> and schematic representation of position of chlorine atoms in <b>1</b> (Fig. S1) | S3  |
| • Angles and distances in halogen···halogen interactions in crystals <b>1a</b> and <b>1b</b> (Fig. S2)                                                                                  |     |
| • Halogen···halogen interactions between the chlorine atoms of <b>1</b> in crystals <b>1a</b> and <b>1b</b> (Fig. S3)                                                                   | S4  |
| • CH···Cl interactions in crystals <b>1d</b> , <b>1e</b> , and <b>1f</b> (Fig. S4)                                                                                                      |     |
| • Single crystal X-ray diffraction experiment for crystal <b>1a</b> (Fig. S5,6)                                                                                                         | S5  |
| • Single crystal X-ray diffraction experiment for crystal <b>1b</b> (Fig. S7,8)                                                                                                         | S7  |
| • Single crystal X-ray diffraction experiment for crystal <b>1c</b> (Fig. S9,10)                                                                                                        | S9  |
| • Single crystal X-ray diffraction experiment for crystal <b>1d</b> (Fig. S11, 12)                                                                                                      | S11 |
| • Single crystal X-ray diffraction experiment for crystal <b>1e</b> (Fig. S13, 14)                                                                                                      | S13 |
| • Single crystal X-ray diffraction experiment for crystal <b>1f</b> (Fig. S15, 16)                                                                                                      | S15 |
| • References                                                                                                                                                                            | S17 |

$^1\text{H}$  NMR spectrum of **1** (400 MHz,  $\text{CDCl}_3$ )

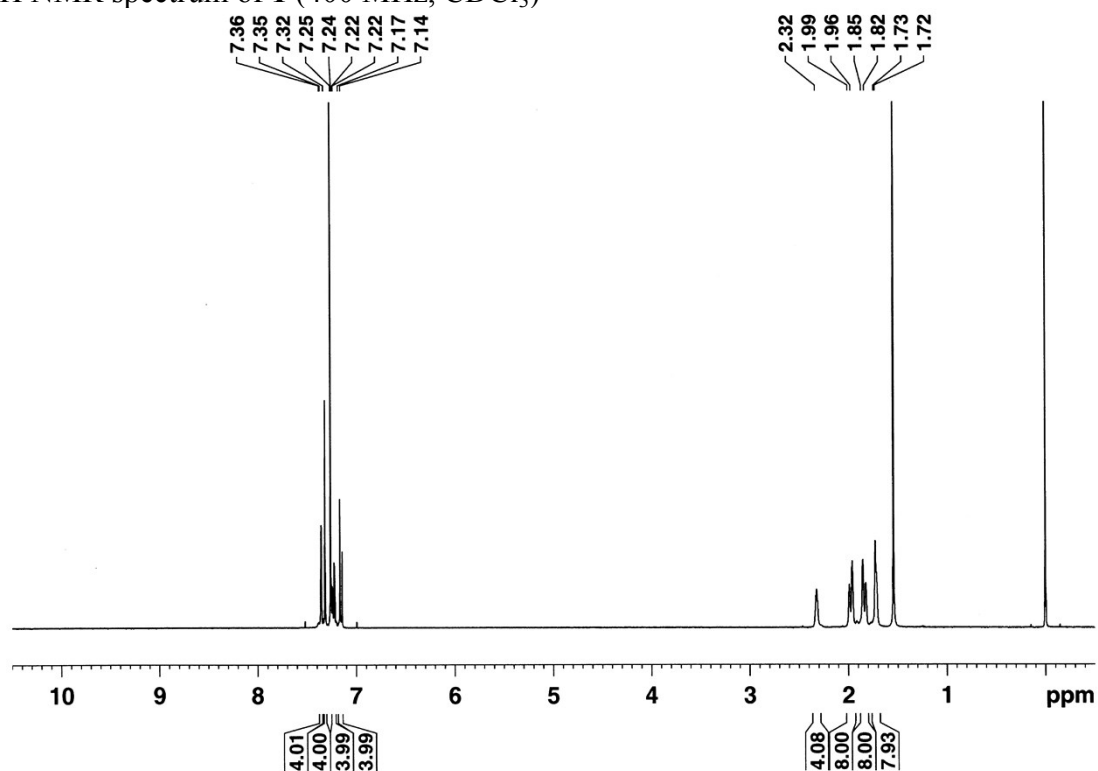

$^{13}\text{C}$  NMR spectrum of **1** (100 MHz,  $\text{CDCl}_3$ )

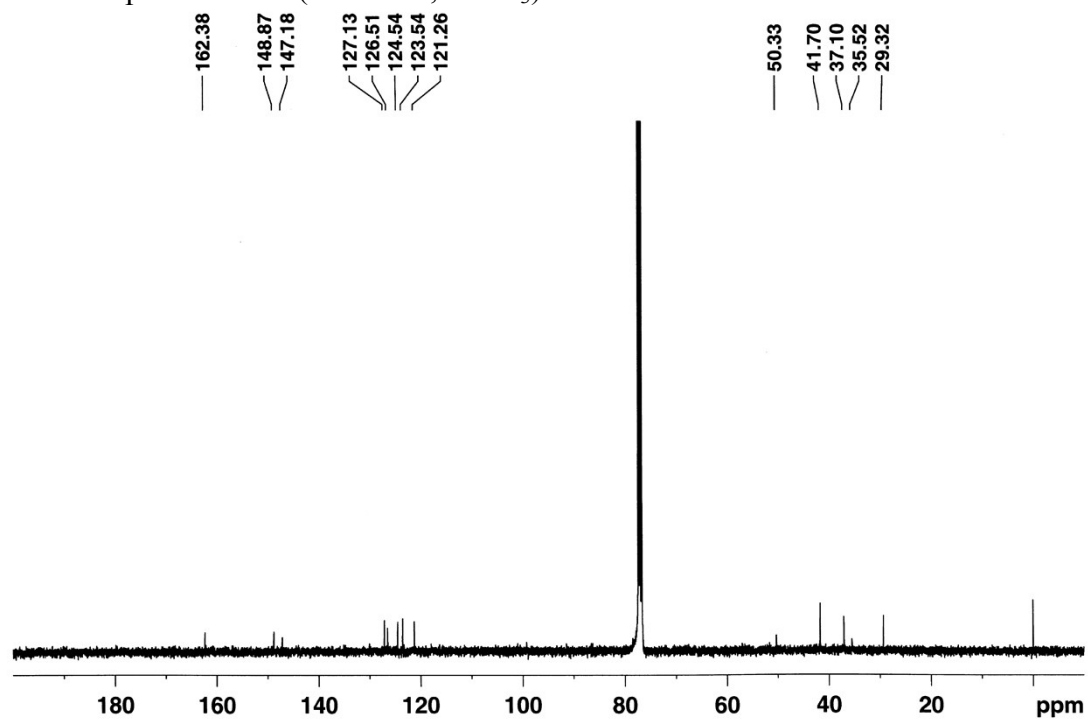

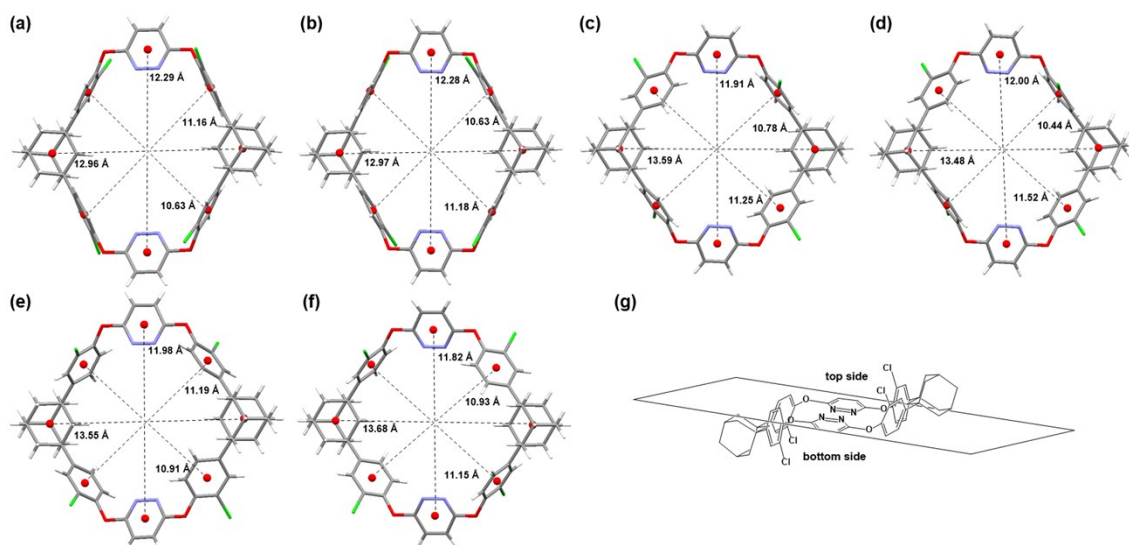

**Fig. S1** The centroid-centroid distances between each aromatic and aliphatic moieties in crystals (a) **1a**, (b) **1b**, (c) **1c**, (d) **1d**, (e) **1e**, and (f) **1f**. Solvents and disordered atoms are omitted for clarity. (g) Schematic representation of position of chlorine atoms in **1**.

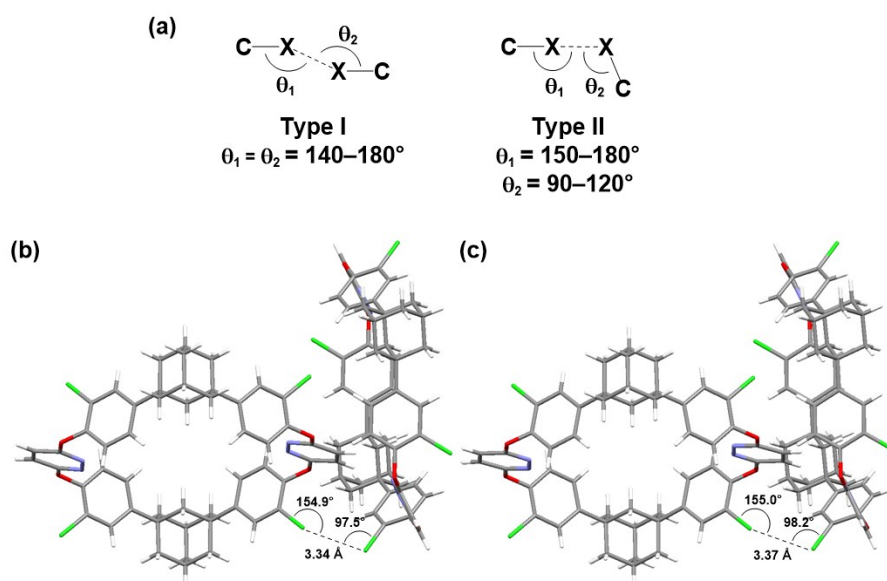

**Fig. S2** (a) Halogen $\cdots$ halogen interactions. The angles and the distances of the intermolecular halogen $\cdots$ halogen interactions in crystals (b) **1a** and (c) **1b**. Halogen $\cdots$ halogen interactions are shown in the dotted lines. Cyclic ethers are omitted for clarity.

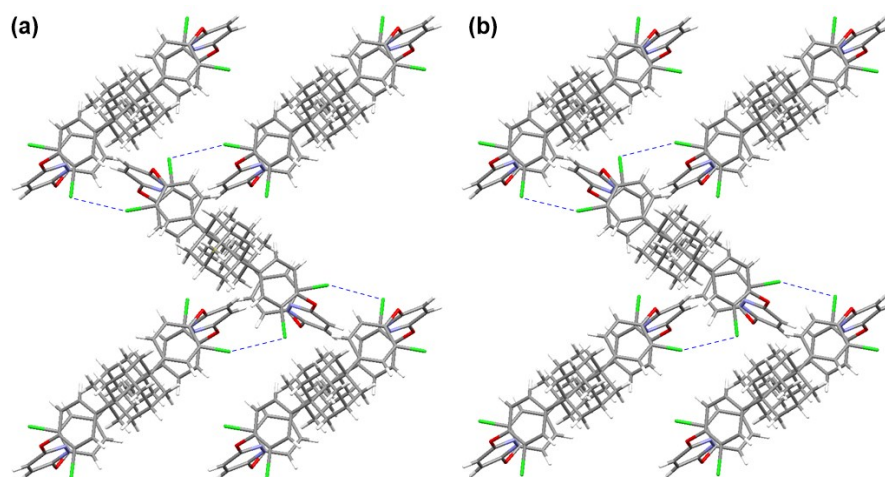

**Fig. S3** Halogen $\cdots$ halogen interactions between the chlorine atoms of **1** in network structures of crystals (a) **1a** and (b) **1b**. Halogen $\cdots$ halogen interactions are shown in the blue dotted lines. Cyclic ethers are omitted for clarity.

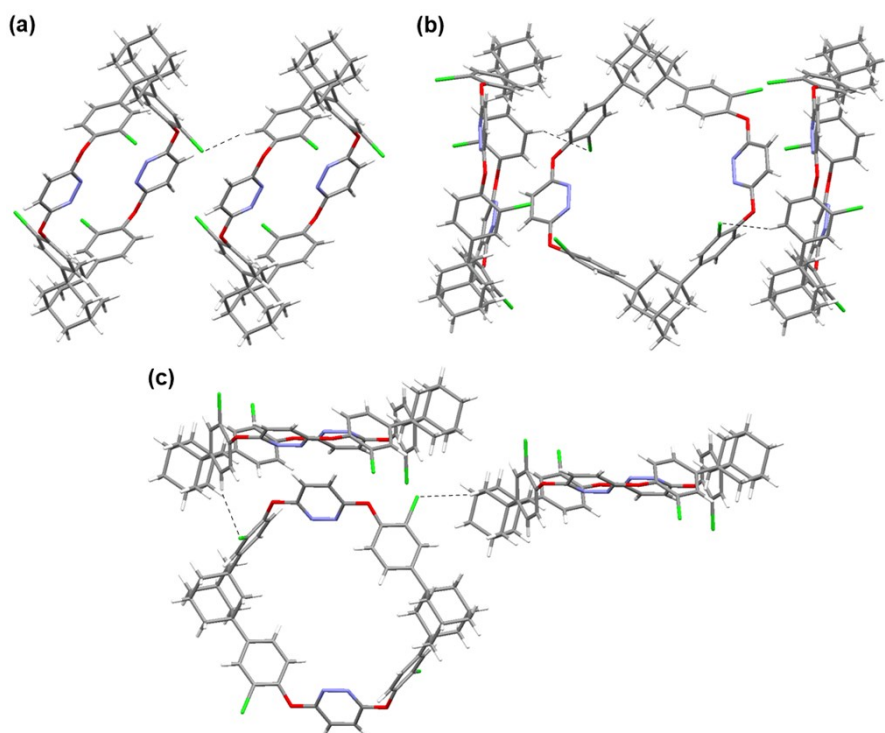

**Fig. S4** CH $\cdots$ Cl interactions in crystals (a) **1d**, (b) **1e**, and (c) **1f**. CH $\cdots$ Cl interactions are shown in the dotted lines. Guest molecules and disordered atoms are omitted for clarity.

### Single crystal X-ray diffraction experiment for crystal 1a

The colorless prismatic crystal ( $0.200 \times 0.100 \times 0.100 \text{ mm}^3$ ), obtained from bicyclohexyl/1,4-dioxane, was immersed in Paraton-N oil and placed in the  $\text{N}_2$  cold stream at 100 K. Data were collected using diffractometer with CMOS detector (Bruker D8 VENTURE,  $\text{CuK}\alpha$ :  $\lambda = 1.54178 \text{ \AA}$ ). Absorption correction was performed by an empirical method implemented in SADABS.<sup>1</sup> Structure solution and refinement were performed by using SHELXT-2014/5<sup>2</sup> and SHELXL-2018/3<sup>3</sup>.

$\text{C}_{64}\text{H}_{68}\text{Cl}_4\text{N}_4\text{O}_{10}$ ,  $M_r = 1195.02$ ; monoclinic, space group  $P2_1/c$ ,  $Z = 2$ ,  $D_{\text{calc}} = 1.404 \text{ g}\cdot\text{cm}^{-3}$ ,  $a = 17.217(3)$ ,  $b = 11.2747(18)$ ,  $c = 16.415(3) \text{ \AA}$ ,  $\beta = 117.459(3)^\circ$ ,  $V = 2827.4(8) \text{ \AA}^3$ , 35202 measured and 5851 independent [ $I > 2\sigma(I)$ ] reflections, 370 parameters, final  $R_1 = 0.0312$ ,  $wR_2 = 0.0892$ ,  $S = 1.150$  [ $I > 2\sigma(I)$ ]. CCDC 2025175

All non-hydrogen atoms were refined anisotropically. The hydrogen atoms were geometrically placed on the calculated positions using a riding model (AFIX 13, 23 and 43) with  $U_{\text{iso}}$  values constrained to 1.2/1.5  $U_{\text{eq}}$  of their parent atoms. Two 1,4-dioxane molecules found were refined as follows. The 1,4-dioxane molecule (C27-C30, and O3-O4) was normally refined. Another 1,4-dioxane molecule (C31-C32, and O5) lied on a symmetric center was firstly refined with the free variable and finally fixed with the site occupancy factor of 1.0.

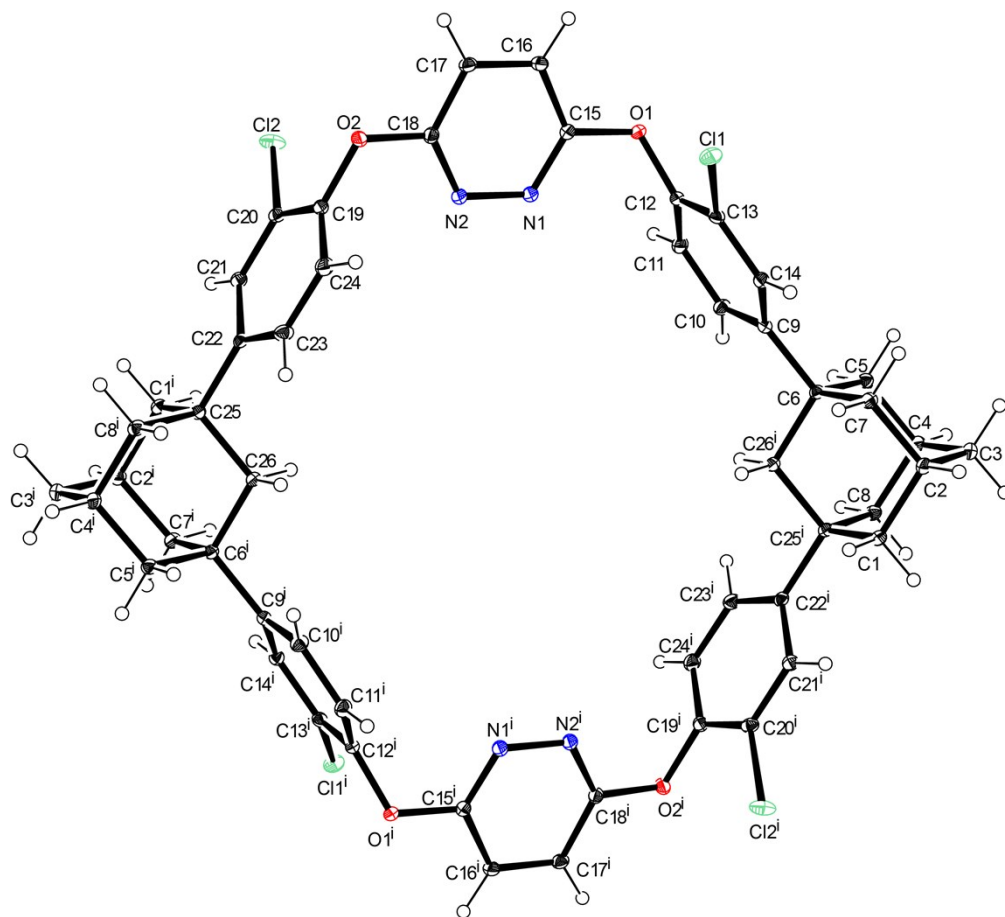

**Fig. S5** Ortep drawing of macrocycle in crystal **1a** (30% probability).

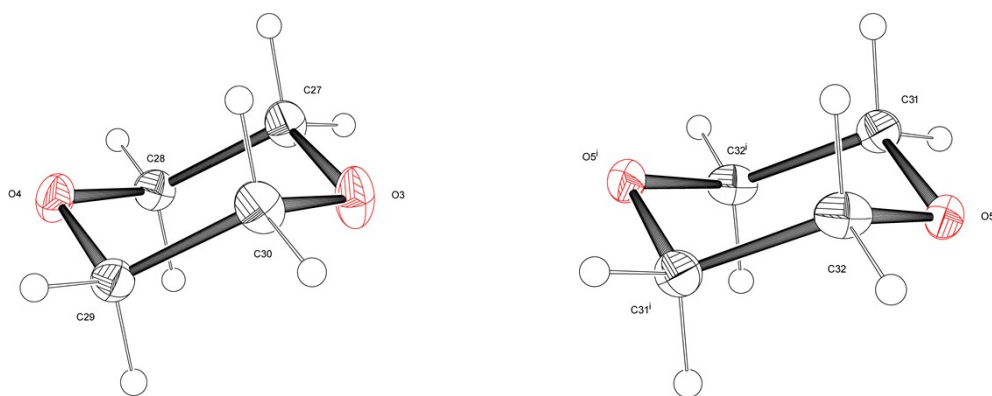

**Fig. S6** Ortep drawing of 1,4-dioxane in crystal **1a** (30% probability).

### Single crystal X-ray diffraction experiment for crystal 1b

The colorless prismatic crystal ( $0.120 \times 0.100 \times 0.100$  mm<sup>3</sup>), obtained from cyclohexane/tetrahydrofuran, was immersed in Paraton-N oil and placed in the N<sub>2</sub> cold stream at 100 K. Data were collected using diffractometer with CMOS detector (Bruker D8 VENTURE, CuK $\alpha$ :  $\lambda = 1.54178$  Å). Absorption correction was performed by an empirical method implemented in SADABS.<sup>1</sup> Structure solution and refinement were performed by using SHELXT-2014/5<sup>2</sup> and SHELXL-2018/3<sup>3</sup>.

C<sub>64</sub>H<sub>68</sub>Cl<sub>4</sub>N<sub>4</sub>O<sub>7</sub>, *Mr* = 1147.02; monoclinic, space group *P*2<sub>1</sub>/*c*, *Z* = 2, *D*<sub>calc</sub> = 1.364 g·cm<sup>-3</sup>, *a* = 17.1722(16), *b* = 11.3008(10), *c* = 16.1727(15) Å,  $\beta$  = 117.160(2)°, *V* = 2792.4(4) Å<sup>3</sup>, 36622 measured and 5721 independent [*I* > 2 $\sigma$ (*I*)] reflections, 380 parameters, 9 restraints, final *R*<sub>1</sub> = 0.0463, *wR*<sub>2</sub> = 0.1454, *S* = 1.154 [*I* > 2 $\sigma$ (*I*)]. CCDC 2025176

All non-hydrogen atoms were refined anisotropically. Hydrogen atoms were refined isotropically on the calculated positions using a riding model (AFIX 13, 23 and 43) with *U*<sub>iso</sub> values constrained to 1.2/1.5 *U*<sub>eq</sub> of their parent atoms. Two tetrahydrofuran molecules found were refined as follows. The tetrahydrofuran molecule (C27-C30, and O3) was normally refined. The overlapped and disordered tetrahydrofuran (C31-C34, and O4) in which the centroid of this molecule is riding on a symmetric center were refined with PART *n*, and occupancy ratio was 0.5:0.5. DELU, DFIX and SIMU was applied to C31-C32.

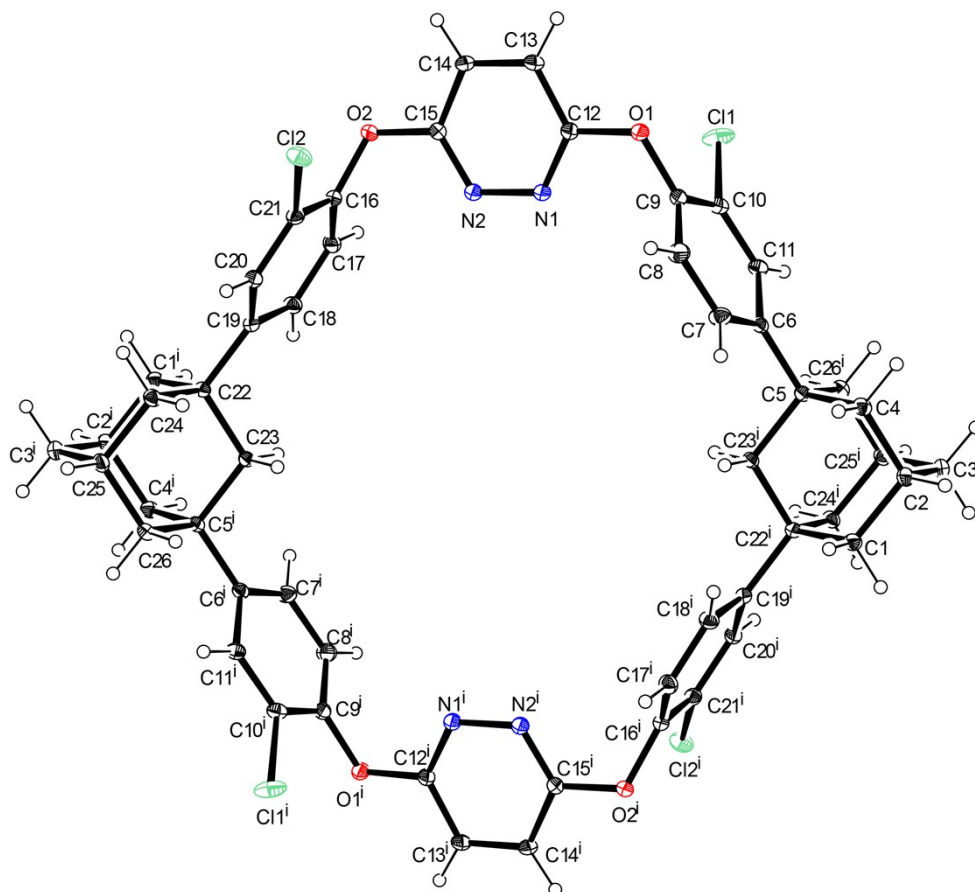

**Fig. S7** Ortep drawing of macrocycle in crystal **1b** (30% probability).

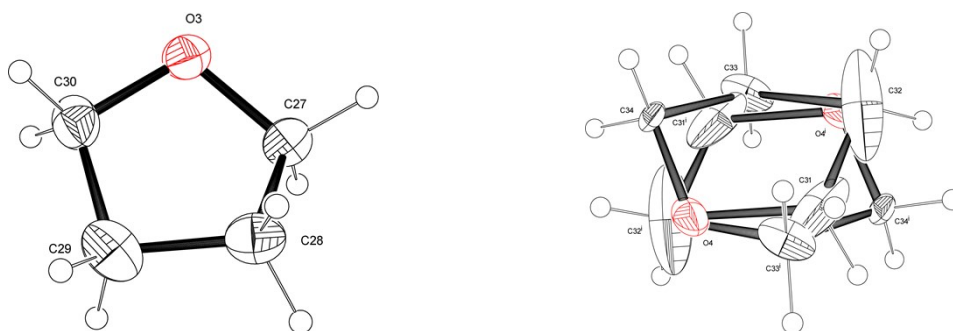

**Fig. S8** Ortep drawing of tetrahydrofuran in crystal **1b** (30% probability).

### Single crystal X-ray diffraction experiment for crystal 1c

The colorless prismatic crystal ( $0.120 \times 0.100 \times 0.100$  mm<sup>3</sup>), obtained from *p*-xylene/tetrahydrofuran, was immersed in Paraton-N oil and placed in the N<sub>2</sub> cold stream at 100 K. Data were collected using diffractometer with CMOS detector (Bruker D8 VENTURE, CuK $\alpha$ :  $\lambda = 1.54178$  Å). Absorption correction was performed by an empirical method implemented in SADABS.<sup>1</sup> Structure solution and refinement were performed by using SHELXT-2014/5<sup>2</sup> and SHELXL-2018/3<sup>3</sup>.

C<sub>60</sub>H<sub>54</sub>Cl<sub>4</sub>N<sub>4</sub>O<sub>4</sub>, *Mr* = 1036.87; monoclinic, space group  $P2_1/c$ ,  $Z = 2$ ,  $D_{\text{calc}} = 1.382$  g·cm<sup>-3</sup>,  $a = 16.5240(14)$ ,  $b = 13.9309(12)$ ,  $c = 11.3445(9)$  Å,  $\beta = 107.390(3)^\circ$ ,  $V = 2492.1(4)$  Å<sup>3</sup>, 28692 measured and 4926 independent [ $I > 2\sigma(I)$ ] reflections, 336 parameters, final  $R_1 = 0.0643$ ,  $wR_2 = 0.1706$ ,  $S = 1.070$  [ $I > 2\sigma(I)$ ]. CCDC 2025177

All non-hydrogen atoms were refined anisotropically. Hydrogen atoms were refined isotropically on the calculated positions using a riding model (AFIX 13, 137, 23 and 43) with  $U_{\text{iso}}$  values constrained to 1.2/1.5  $U_{\text{eq}}$  of their parent atoms. One chlorine atom is disordered to two positions (Cl1 and Cl3). The occupancies of the disordered atoms are refined (0.73 and 0.27). The *p*-xylene molecule lied on a symmetric center was firstly refined with the free variable and finally fixed with the site occupancy factor of 1.0.

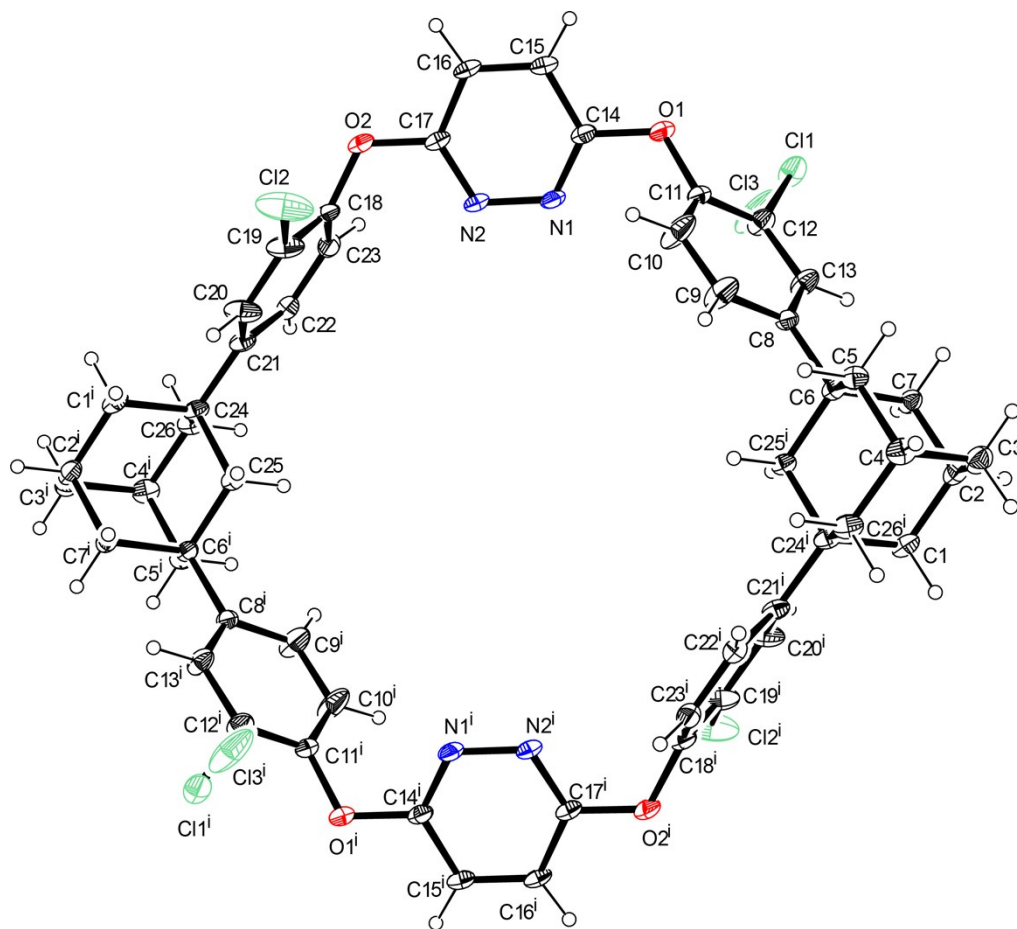

**Fig. S9** Ortep drawing of macrocycle in crystal **1c** (30% probability).

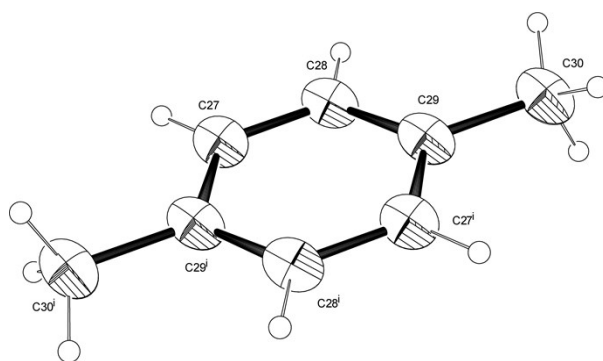

**Fig. S10** Ortep drawing of *p*-xylene of crystal **1c** (30% probability).

### Single crystal X-ray diffraction experiment for crystal 1d

The colorless prismatic crystal ( $0.200 \times 0.100 \times 0.100 \text{ mm}^3$ ), obtained from toluene/tetrahydrofuran, was immersed in Paraton-N oil and placed in the  $\text{N}_2$  cold stream at 100 K. Data were collected using diffractometer with CMOS detector (Bruker D8 VENTURE,  $\text{CuK}\alpha$ :  $\lambda = 1.54178 \text{ \AA}$ ). Absorption correction was performed by an empirical method implemented in SADABS.<sup>1</sup> Structure solution and refinement were performed by using SHELXT-2014/5<sup>2</sup> and SHELXL-2018/3<sup>3</sup>.

$\text{C}_{59}\text{H}_{52}\text{Cl}_4\text{N}_4\text{O}_4$ ,  $M_r = 1022.84$ ; orthorhombic, space group  $Pbca$ ,  $Z = 4$ ,  $D_{\text{calc}} = 1.391 \text{ g}\cdot\text{cm}^{-3}$ ,  $a = 13.6415(17)$ ,  $b = 11.1851(14)$ ,  $c = 32.017(4) \text{ \AA}$ ,  $V = 4885.2(10) \text{ \AA}^3$ , 62640 measured and 5118 independent [ $I > 2\sigma(I)$ ] reflections, 365 parameters, 1 restraints, final  $R_1 = 0.0631$ ,  $wR_2 = 0.1729$ ,  $S = 1.288$  [ $I > 2\sigma(I)$ ]. CCDC 2025178

All non-hydrogen atoms were refined anisotropically. Hydrogen atoms were refined isotropically on the calculated positions using a riding model (AFIX 13, 137, 23 and 43) with  $U_{\text{iso}}$  values constrained to 1.2/1.5  $U_{\text{eq}}$  of their parent atoms. One chlorine atom is disordered to two positions (Cl1a and Cl1b). The occupancies of the disordered atoms are refined (0.53 and 0.47). The toluene molecule lied on a symmetric center was firstly refined with free variable and finally fixed with the occupancy of 0.5 (combination with PART -n).

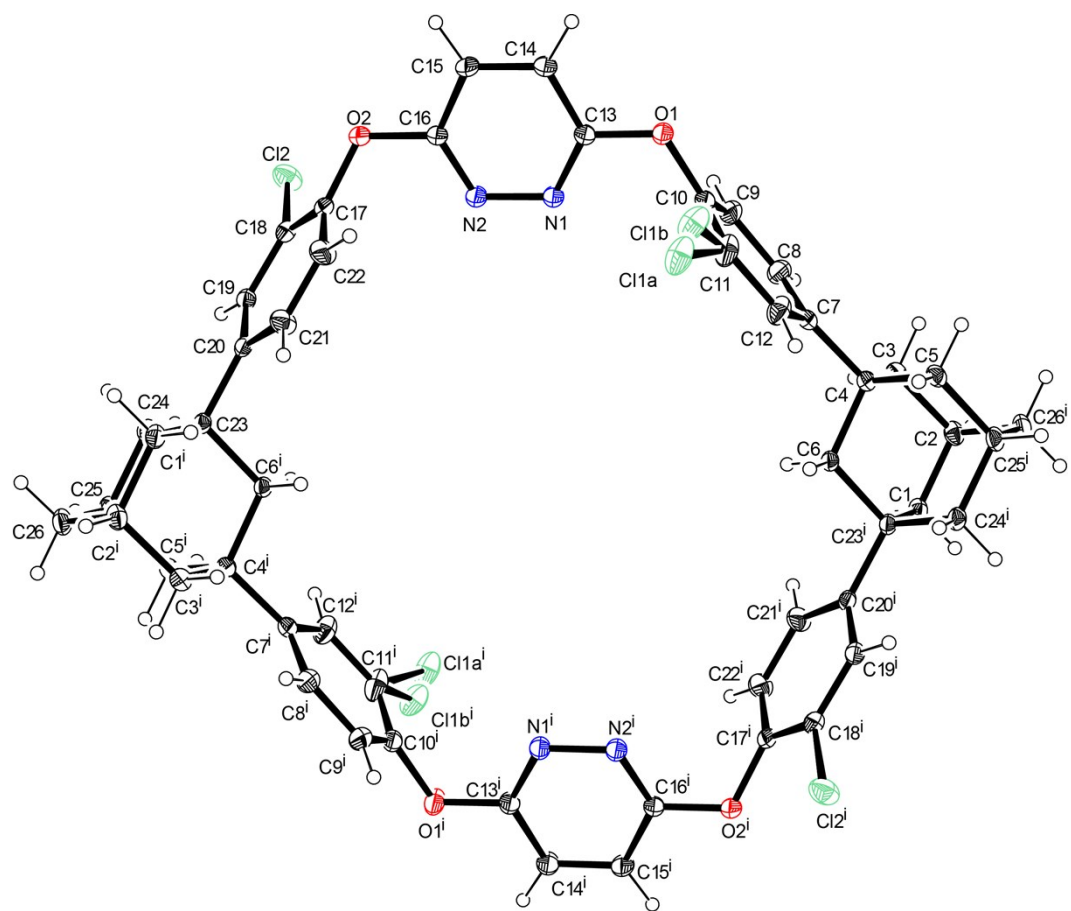

**Fig. S11** Ortep drawing of macrocycle in crystal **1d** (30% probability).

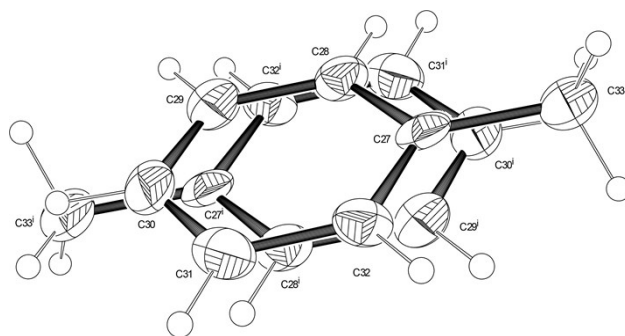

**Fig. S12** Ortep drawing of toluene in crystal **1d** (30% probability).

### Single crystal X-ray diffraction experiment for crystal 1e

The colorless prismatic crystal ( $0.100 \times 0.050 \times 0.050 \text{ mm}^3$ ), obtained from acetone/chloroform, was immersed in Paraton-N oil and placed in the  $\text{N}_2$  cold stream at 100 K. Data were collected using diffractometer with CMOS detector (Bruker D8 VENTURE,  $\text{CuK}\alpha$ :  $\lambda = 1.54178 \text{ \AA}$ ). Absorption correction was performed by an empirical method implemented in SADABS.<sup>1</sup> Structure solution and refinement were performed by using SHELXT-2014/5<sup>2</sup> and SHELXL-2018/3<sup>3</sup>.

$\text{C}_{54}\text{H}_{46}\text{Cl}_{10}\text{N}_4\text{O}_4$ ,  $M_r = 1169.45$ ; orthorhombic, space group  $P2_12_12_1$ ,  $Z = 4$ ,  $D_{\text{calc}} = 1.518 \text{ g}\cdot\text{cm}^{-3}$ ,  $a = 11.8817(5)$ ,  $b = 13.9512(6)$ ,  $c = 30.8666(13) \text{ \AA}$ ,  $V = 5116.6(4) \text{ \AA}^3$ , 60546 measured and 7493 independent [ $I > 2\sigma(I)$ ] reflections, 659 parameters, final  $R_1 = 0.0584$ ,  $wR_2 = 0.1336$ ,  $S = 1.030$  [ $I > 2\sigma(I)$ ]. CCDC 2025179

All non-hydrogen atoms including two chloroform molecules were refined anisotropically. Hydrogen atoms were refined isotropically on the calculated positions using a riding model (AFIX 13, 23 and 43) with  $U_{\text{iso}}$  values constrained to 1.2/1.5  $U_{\text{eq}}$  of their parent atoms. One chlorine atom in the host molecule is disordered to two positions (Cl1a and Cl1b). The occupancies of the disordered atoms are refined (0.57 and 0.43).

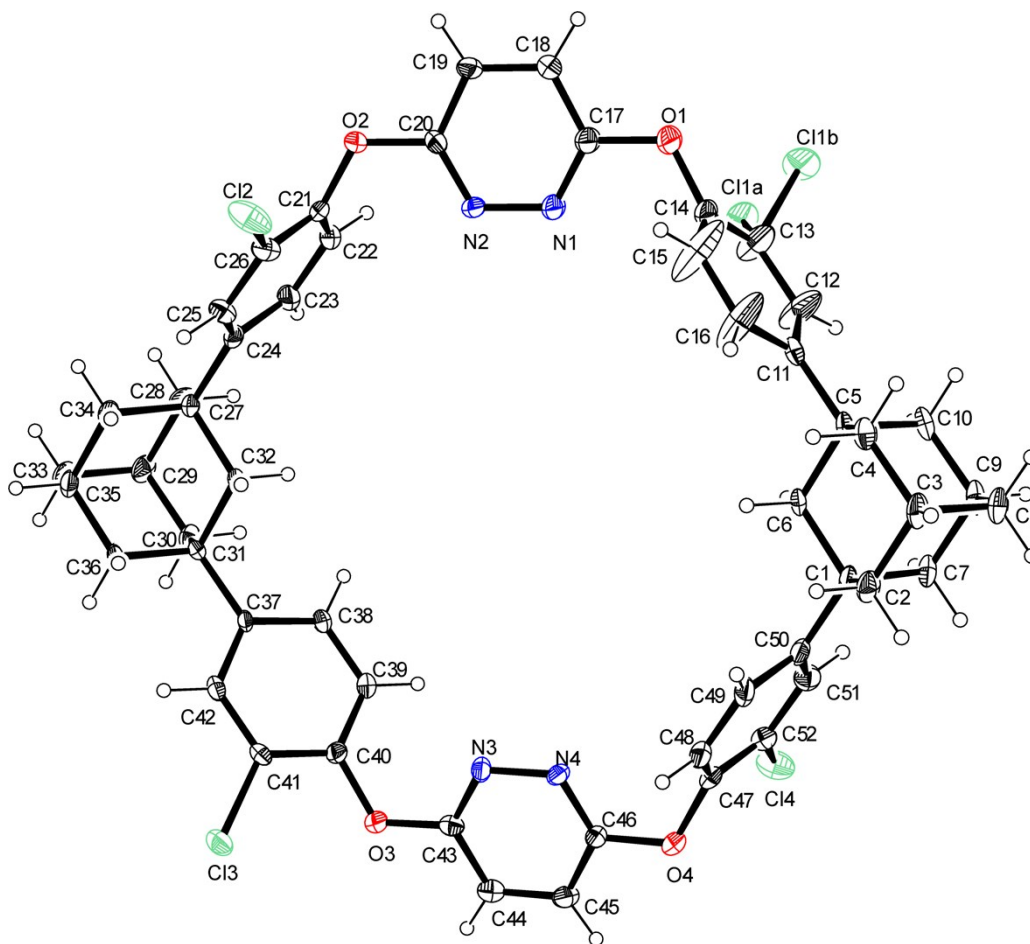

**Fig. S13** Ortep drawing of macrocycle in crystal **1e** (30% probability).

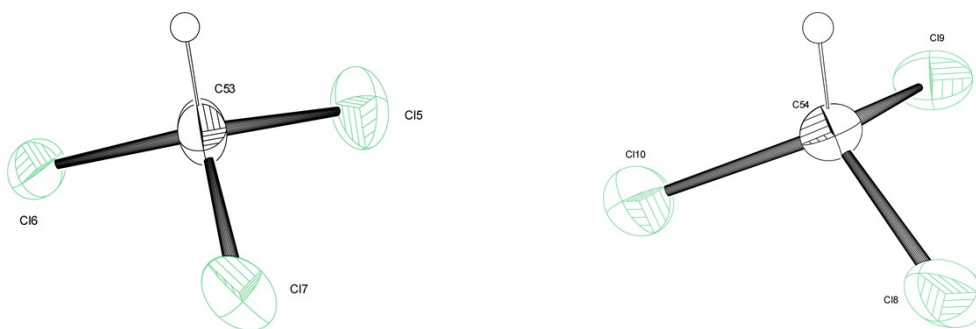

**Fig. S14** Ortep drawing of chloroform in crystal **1e** (30% probability).

### Single crystal X-ray diffraction experiment for crystal 1f

The colorless prismatic crystal ( $0.300 \times 0.200 \times 0.100 \text{ mm}^3$ ), obtained from hexane/dichloromethane was immersed in Paraton-N oil and placed in the  $\text{N}_2$  cold stream at 100 K. The diffraction experiment was performed in a Bruker APEX II system (APEX II CCD detector,  $\text{MoK}\alpha$ :  $\lambda = 0.71073 \text{ \AA}$ ) Absorption correction was performed by an empirical method implemented in SADABS.<sup>1</sup> Structure solution and refinement were performed by using SHELXT-2014/5<sup>2</sup> and SHELXL-2018/3<sup>3</sup>.

$\text{C}_{54}\text{H}_{48}\text{Cl}_8\text{N}_4\text{O}_4$ ,  $M_r = 1100.56$ ; monoclinic, space group  $P2_1/c$ ,  $Z = 2$ ,  $D_{\text{calc}} = 1.461 \text{ g}\cdot\text{cm}^{-3}$ ,  $a = 16.397(4)$ ,  $b = 13.840(3)$ ,  $c = 11.647(3) \text{ \AA}$ ,  $\beta = 108.793(3)^\circ$ ,  $V = 2502.1(10) \text{ \AA}^3$ , 22485 measured and 3020 independent [ $I > 2\sigma(I)$ ] reflections, 344 parameters, final  $R_1 = 0.0552$ ,  $wR_2 = 0.1480$ ,  $S = 1.037$  [ $I > 2\sigma(I)$ ]. CCDC 2025180

All non-hydrogen atoms were refined anisotropically. Hydrogen atoms were refined isotropically on the calculated positions using a riding model (AFIX 13, 23 and 43) with  $U_{\text{iso}}$  values constrained to 1.2/1.5  $U_{\text{eq}}$  of their parent atoms. Disordered and overlapped two dichloromethane molecules, C27, Cl3, Cl4 and C28, Cl5, Cl6, were refined by PART with occupancies of 0.72 and 0.28, respectively.

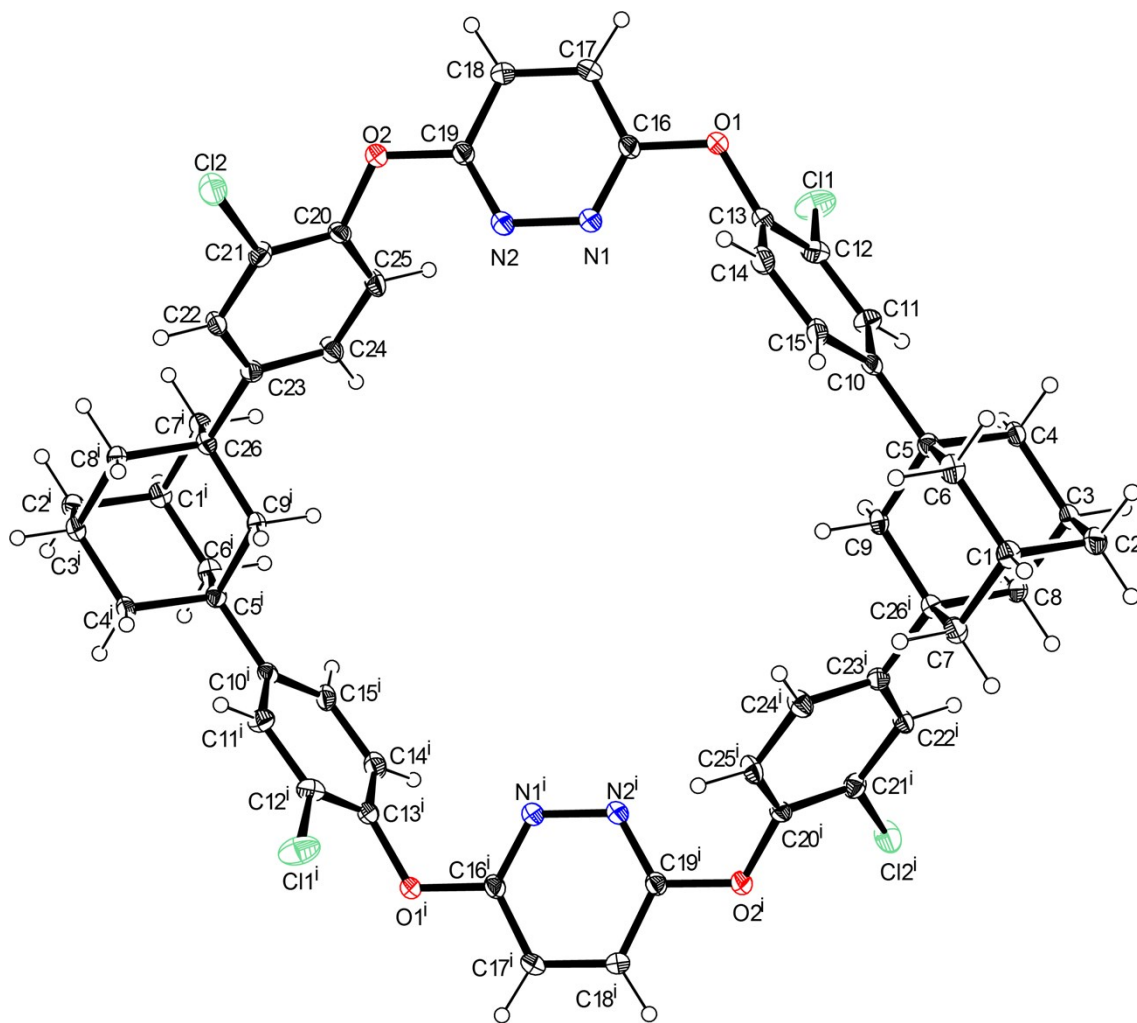

**Fig. S15** Ortep drawing of macrocycle in crystal **1f** (30% probability).

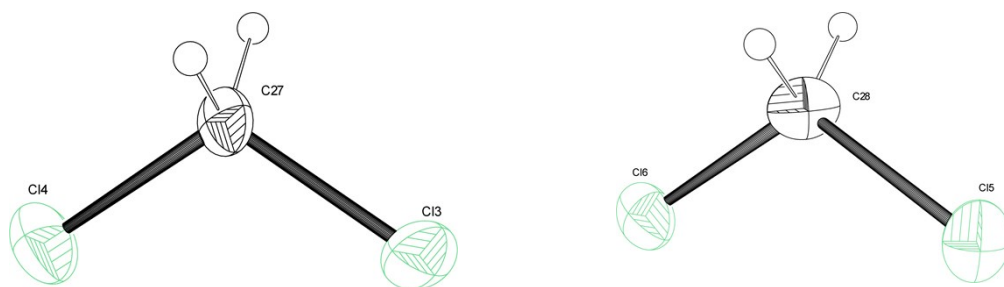

**Fig. S16** Ortep drawing of dichloromethane in crystal **1f** (30% probability).

## References

- (1) G. M. Sheldrick, *SADABS*. University of Göttingen, Germany, 1996.
- (2) G. M. Sheldrick, *Acta Crystallogr., Sect. A: Found. Adv.*, 2015, **71**, 3–8.
- (3) G. M. Sheldrick, *Acta Crystallogr., Sect. C: Struct. Chem.*, 2015, **71**, 3–8.
